# Supplementary material for: Vitamin D deficiency in early life regulates gut microbiome composition and leads to impaired glucose tolerance in adult and offspring rats
Source: Royal Society of Chemistry journal article supplement (doi:10.1039/d3fo00503h), 2023-01-01
Supplement: d3fo00503h1.pdf [file d3fo00503h1.pdf]

## Supplementary Figure legends

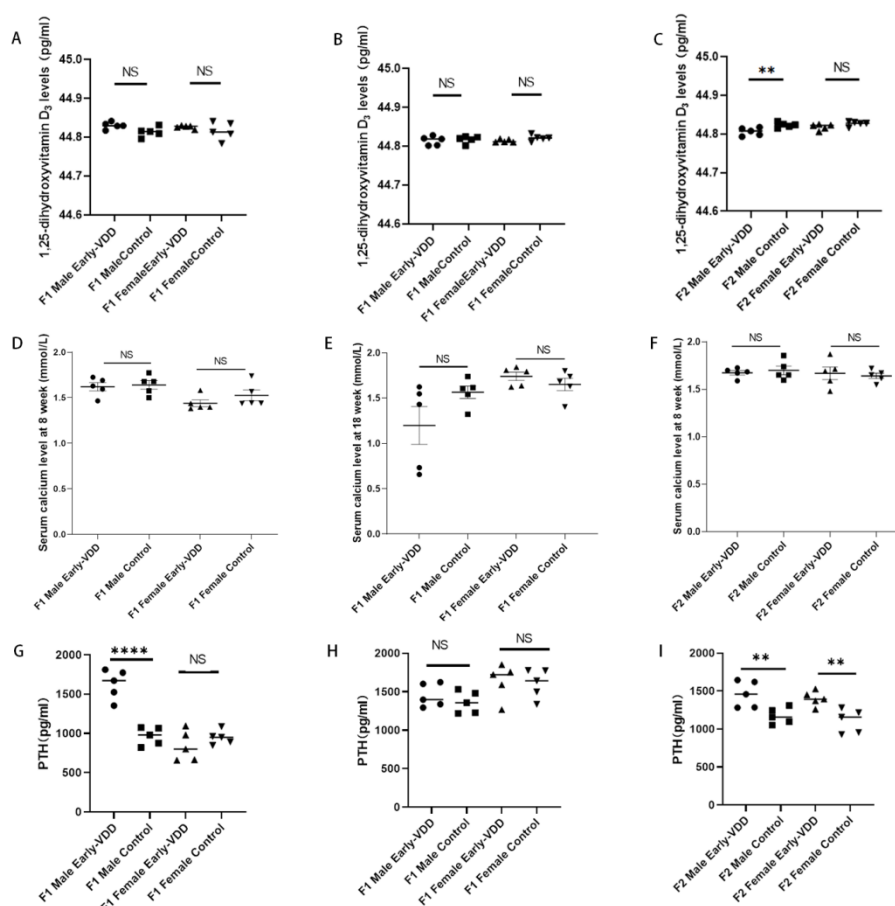

**Fig S1.** Vitamin D deficiency in early life effect on serum 1,25-dihydroxyvitamin D<sub>3</sub>, calcium and PTH in adult and offspring rats. 1,25-dihydroxyvitamin D<sub>3</sub> levels in the serum of (A) F1 rats at 8 week, (B) F1 rats at 18 week, (C) F2 rats at 8 week. Serum calcium ion levels in (D) F1 rats at 8 week, (E) F1 rats at 18 week, (F) F2 rats at 8 week. PTH levels in the serum of (G) F1 rats at 8 week, (H) F1 rats at 18 week, (I) F2 rats at 8 week. Data were presented as the means  $\pm$  SDs, Early-VDD vs. Control group \*  $P < 0.05$ .

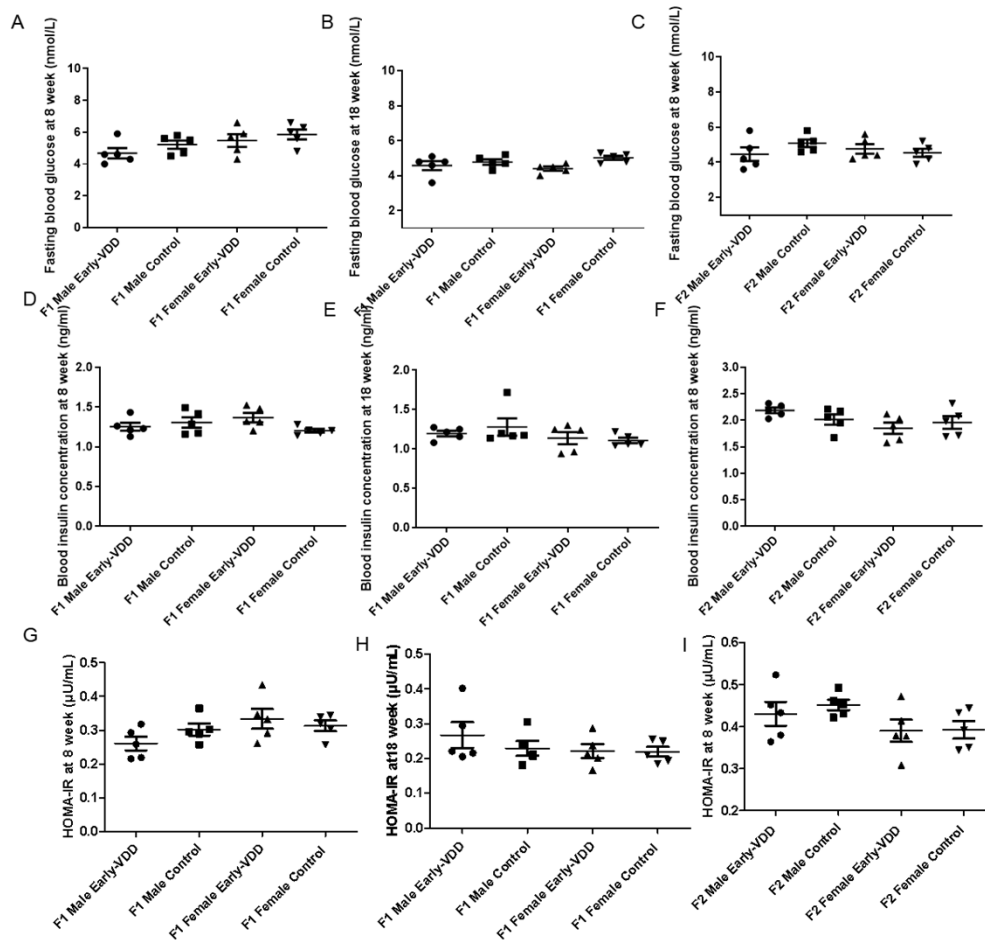

**Fig S2.** The effect of early vitamin D deficiency on fasting blood glucose, blood insulin concentration and HOMA-IR in adult and offspring rats. Fasting blood glucose levels of (A) F1 rats 8 week, (B) F1 rats 18 week and (C) F2 rats 8 week. Blood insulin concentration of (D) F1 rats 8 week, (E) F1 rats 18 week and (F) F2 rats 8 week. HOMA-IR levels of (G) F1 rats 8 week, (H) F1 rats 18 week, (I) F2 rats 8 week. Data were presented as the means  $\pm$  SDs, Early-VDD vs. Control group \*  $P < 0.05$ .

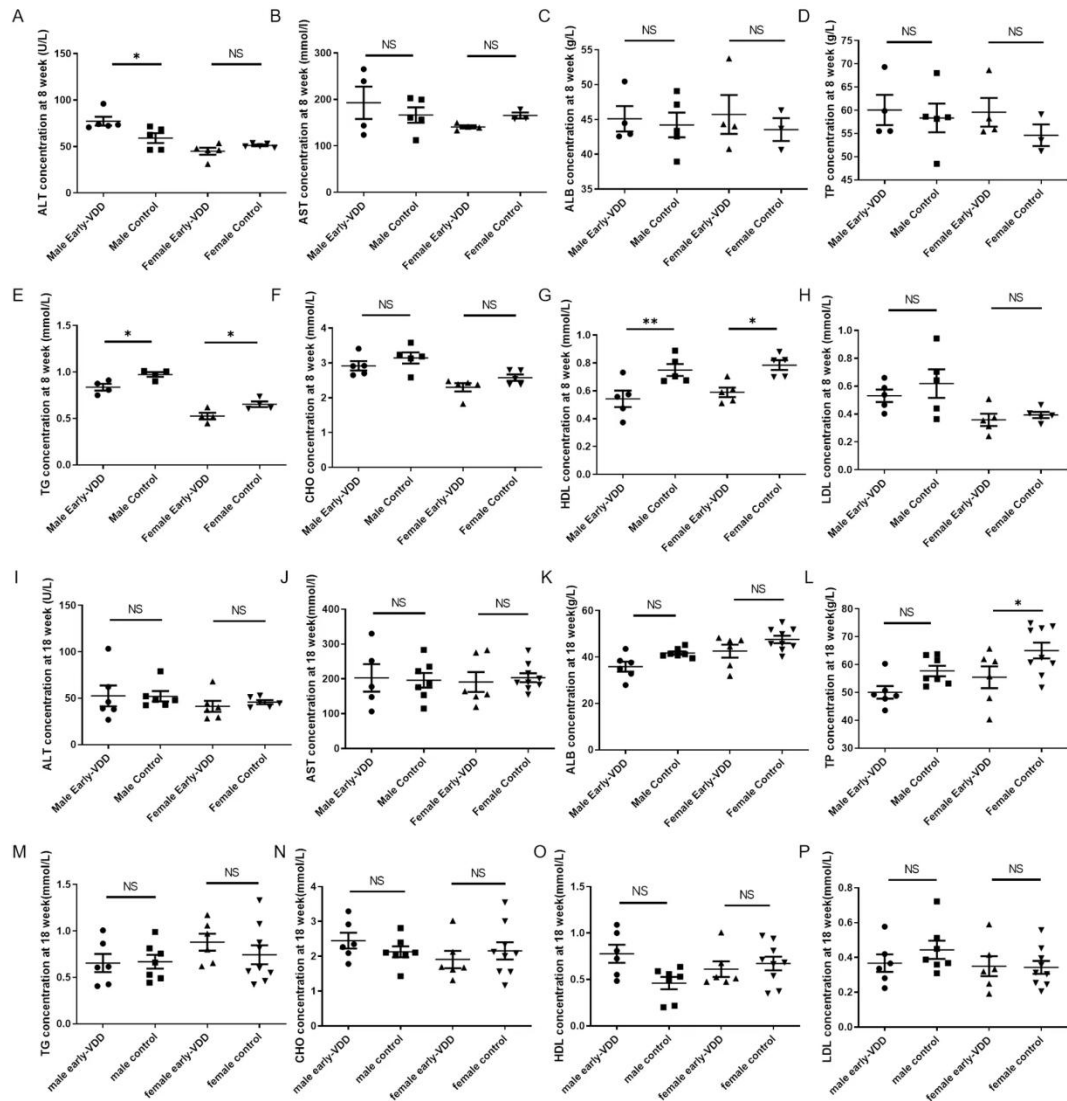

**Fig S3.** The effect of early vitamin D deficiency on serum lipid metabolism in F1 rats. Lipid metabolism of F1 rats at 8 week (A-H). (A) ALT, (B) AST, (C) ALB, (D) TP, (E) TG, (F) CHO, (G) HDL, (H) LDL. Lipid metabolism of F1 rats at 18 week (I-P). (I) ALT, (J) AST, (K) ALB, (L) TP, (M) TG, (N) CHO, (O) HDL, (P) LDL. Data were presented as the means  $\pm$  SDs, Early-VDD vs. Control group \*  $P < 0.05$ .

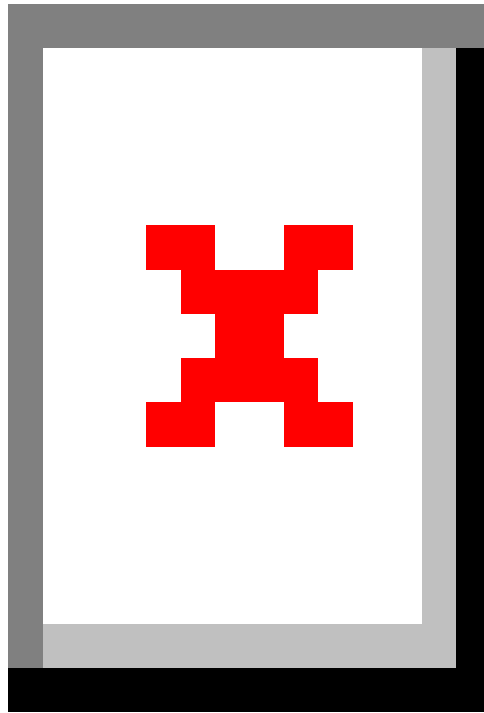

**Fig. S4. Vitamin D deficiency in early life alters the composition of gut microbiota in F1 male rats at 8 week.** (A) Comparison of Alpha Diversity of gut microbiota between different groups using Shannon index. (B) Comparison of Beta Diversity of gut microbiota between different groups using non-linear model PCoA method based on OTUs information in samples. (C) Relative abundance of microbiota at the genus level. (D) Cladogram generated from LEfSe analysis. (E) A histogram of the log 10 transformed Linear discriminant analysis (LDA) scores was computed for features that showed differential abundance between F1 Male Early-VDD and F1 Male Control at 8 week. (F) The top ten genera with a rich difference between F1 Male Early-VDD and F1 Male Control at 8 week.



**Fig. S5. Vitamin D deficiency in early life alters the composition of gut microbiota in F1 female rats at 8 week.** (A) Comparison of Alpha Diversity of gut microbiota between different groups using Shannon index. (B) Comparison of Beta Diversity of gut microbiota between different groups using non-linear model PCoA method based on OTUs information in samples. (C) Relative abundance of microbiota at the genus level. (D) Cladogram generated from LEfSe analysis. (E) A histogram of the log 10 transformed Linear discriminant analysis (LDA) scores was computed for features that showed differential abundance between F1 Female Early-VDD and F1 Female Control at 8 week. (F) The top ten genera with a rich difference between F1 Female Early-VDD and F1 Female Control at 8 week.

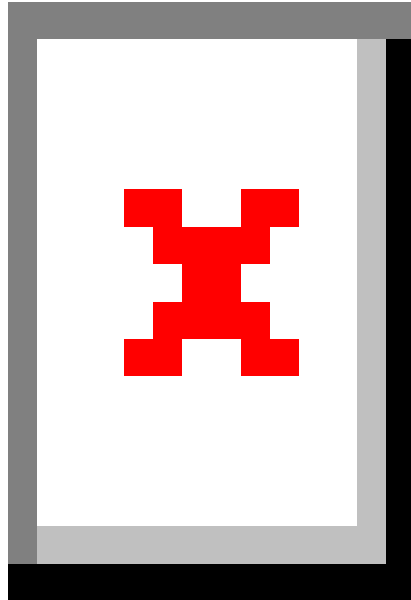

**Fig. S6. Vitamin D deficiency in early life effects on the composition of gut microbiota in F1 male rats at 18 week.** (A) Comparison of Alpha Diversity of gut microbiota between different groups using Shannon index. (B) Comparison of Beta Diversity of gut microbiota between different groups using non-linear model PCoA method based on OTUs information in samples. (C) Relative abundance of microbiota at the genus level. (D) Cladogram generated from LEfSe analysis. (E) A histogram of the log 10 transformed Linear discriminant analysis (LDA) scores was computed for features that showed differential abundance between F1 Male Early-VDD and F1 Male Control at 18 week. (F) The top ten genera with a rich difference between F1 Male Early-VDD and F1 Male Control at 18 week.

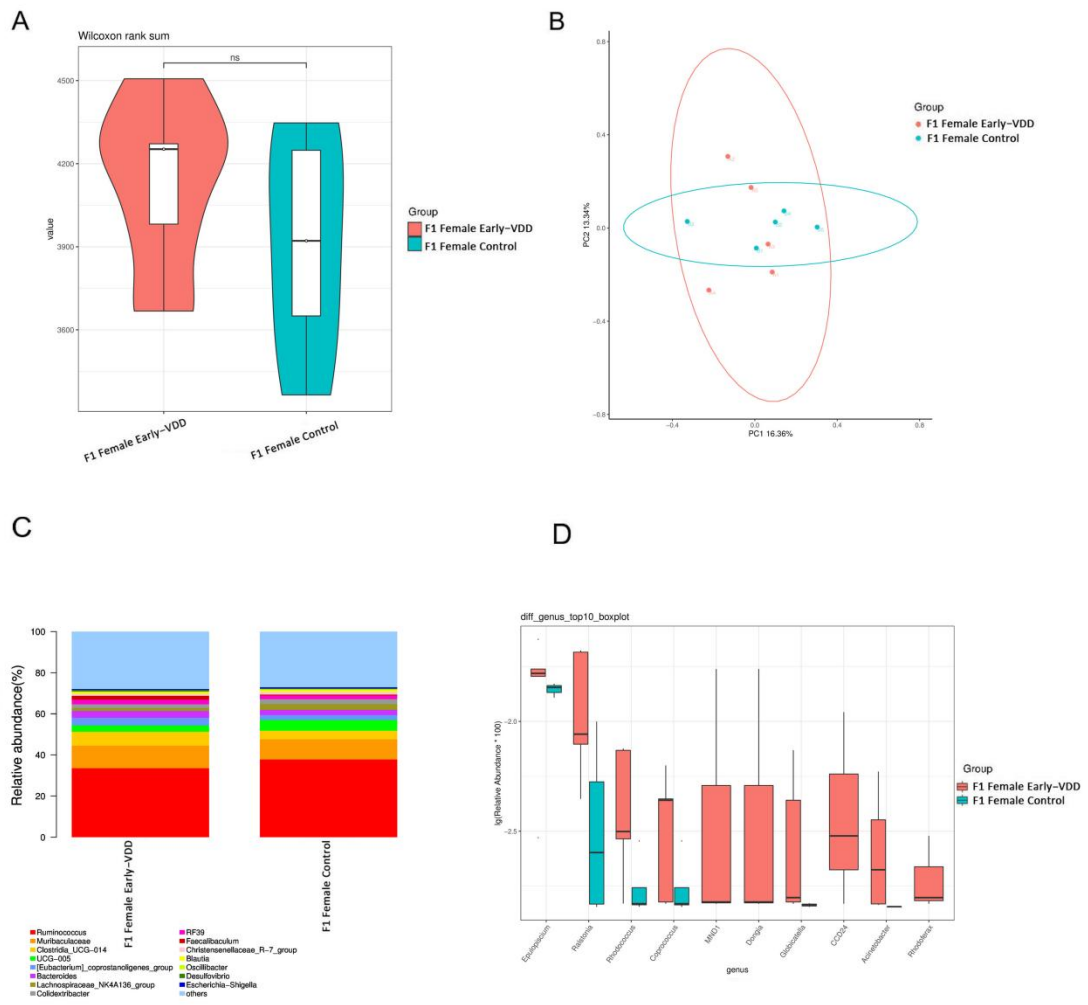

**Fig. S7. Vitamin D deficiency in early life effects on the composition of gut microbiota in F1 female rats at 18 week.** (A) Comparison of Alpha Diversity of gut microbiota between different groups using Shannon index. (B) Comparison of Beta Diversity of gut microbiota between different groups using non-linear model PCoA method based on OTUs information in samples. (C) Relative abundance of microbiota at the genus level. (D) The top ten genera with a rich difference between F1 Female Early-VDD and F1 Female Control at 18 week.

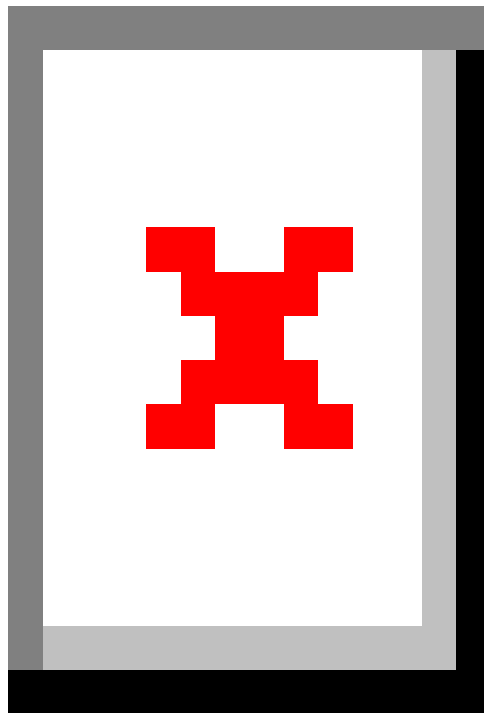

**Fig. S8. Vitamin D deficiency in early life alters the composition of gut microbiota in F2 male rats at 8 week.** (A) Comparison of Alpha Diversity of gut microbiota between different groups using Shannon index. (B) Comparison of Beta Diversity of gut microbiota between different groups using non-linear model PCoA method based on OTUs information in samples. (C) Relative abundance of microbiota at the genus level. (D) Cladogram generated from LEfSe analysis. (E) A histogram of the log 10 transformed Linear discriminant analysis (LDA) scores was computed for features that showed differential abundance between F2 Male Early-VDD and F2 Male Control at 8 week. (F) The top ten genera with a rich difference between F2 Male Early-VDD and F2 Male Control at 8 week.





**Fig. S9. Vitamin D deficiency in early life alters the composition of gut microbiota in F2 female rats at 8 week.** (A) Comparison of Alpha Diversity of gut microbiota between different groups using Shannon index. (B) Comparison of Beta Diversity of gut microbiota between different groups using non-linear model PCoA method based on OTUs information in samples. (C) Relative abundance of microbiota at the genus level. (D) Cladogram generated from LEfSe analysis. (E) A histogram of the log 10 transformed Linear discriminant analysis (LDA) scores was computed for features that showed differential abundance between F2 Female Early-VDD and F2 Female Control at 8 week. (F) The top ten genera with a rich difference between F2 Female Early-VDD and F2 Female Control at 8 week.



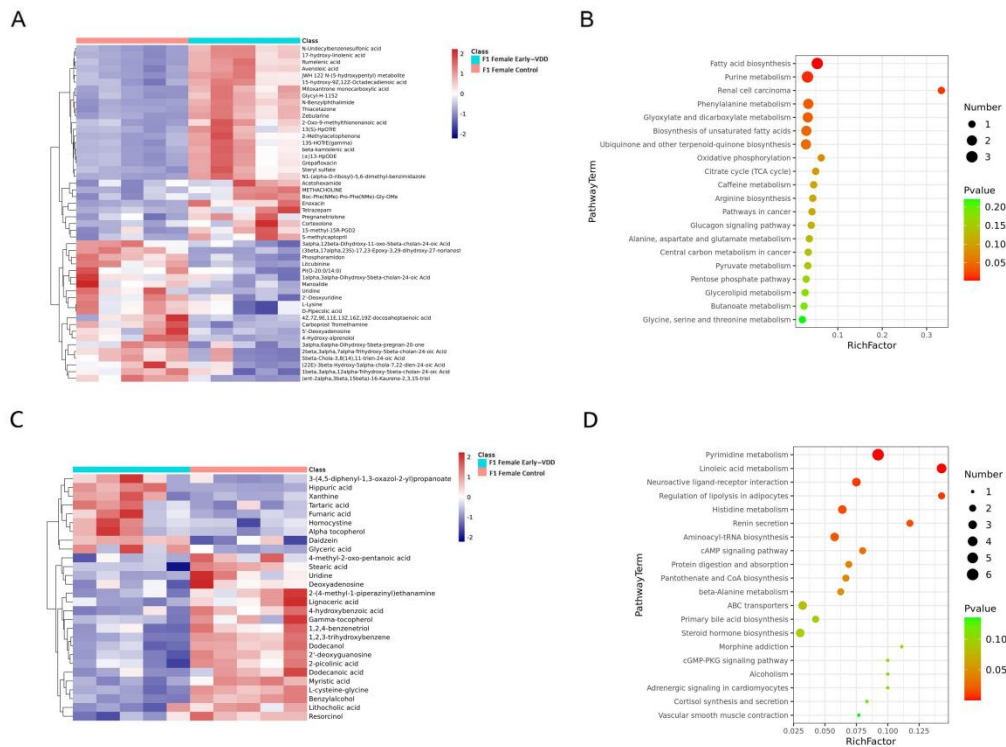

**Fig. S11. Changes of metabolites and metabolic pathways in feces of F1 female rats at 8 week.** (A) Heatmap of changed fecal metabolites in F1 Female Early-VDD and F1 Female Control by LC-MS analysis at 8 week. (B) KEGG enriched pathways of changed fecal metabolites by LC-MS in F1 Female Early-VDD vs. F1 Female Control at 8 week. (C) Heatmap of changed fecal metabolites in F1 Female Early-VDD and F1 Female Control by GC-MS analysis at 8 week. (D) KEGG enriched pathways of changed fecal metabolites by GC-MS in F1 Female Early-VDD vs. F1 Female Control at 8 week.

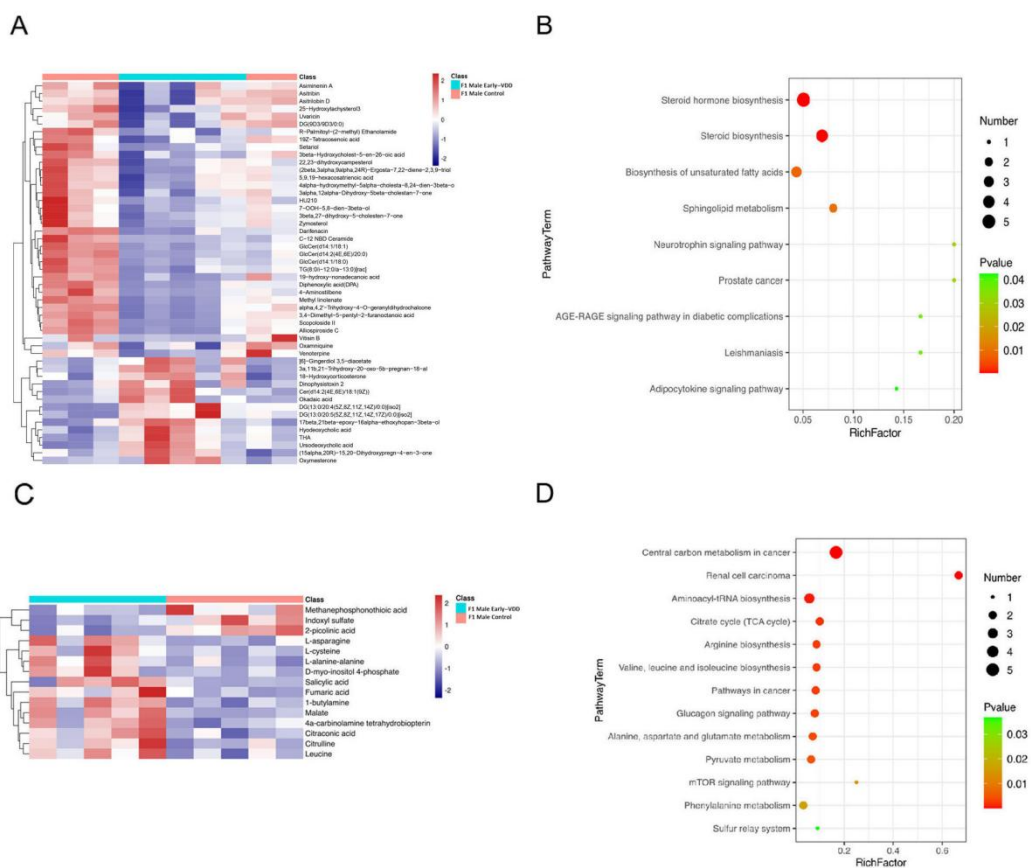

**Fig. S12. Changes of metabolites and metabolic pathways in feces of F1 male rats at 18 week.** (A) Heatmap of changed fecal metabolites in F1 Male Early-VDD and F1 Male Control by LC-MS analysis at 8 week. (B) KEGG enriched pathways of changed fecal metabolites by LC-MS in F1 Male Early-VDD vs. F1 Male Control at 8 week. (C) Heatmap of changed fecal metabolites in F1 Male Early-VDD and F1 Male Control by GC-MS analysis at 8 week. (D) KEGG enriched pathways of changed fecal metabolites by GC-MS in F1 Male Early-VDD vs. F1 Male Control at 8 week.



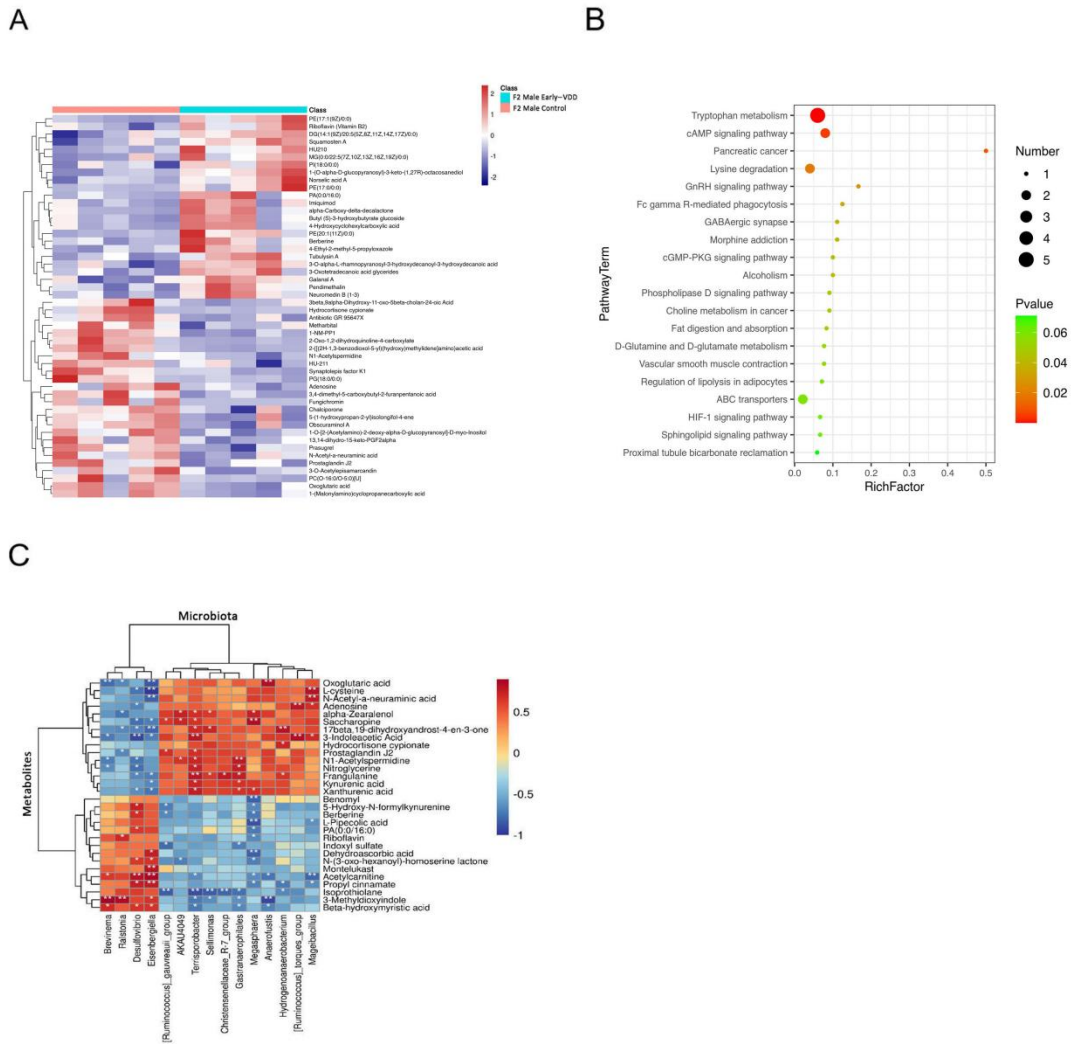

**Fig. S14. Changes of metabolites and metabolic pathways in feces of F2 male rats at 8 week.** Heatmap of changed fecal metabolites in F2 Male Early-VDD and F2 Male Control at 8 week. (B) KEGG enriched pathways of changed fecal metabolites in F1 Male Early-VDD vs. F1 Male Control at 8 week. (C) Correlation of fecal metabolites and gut microbiota.

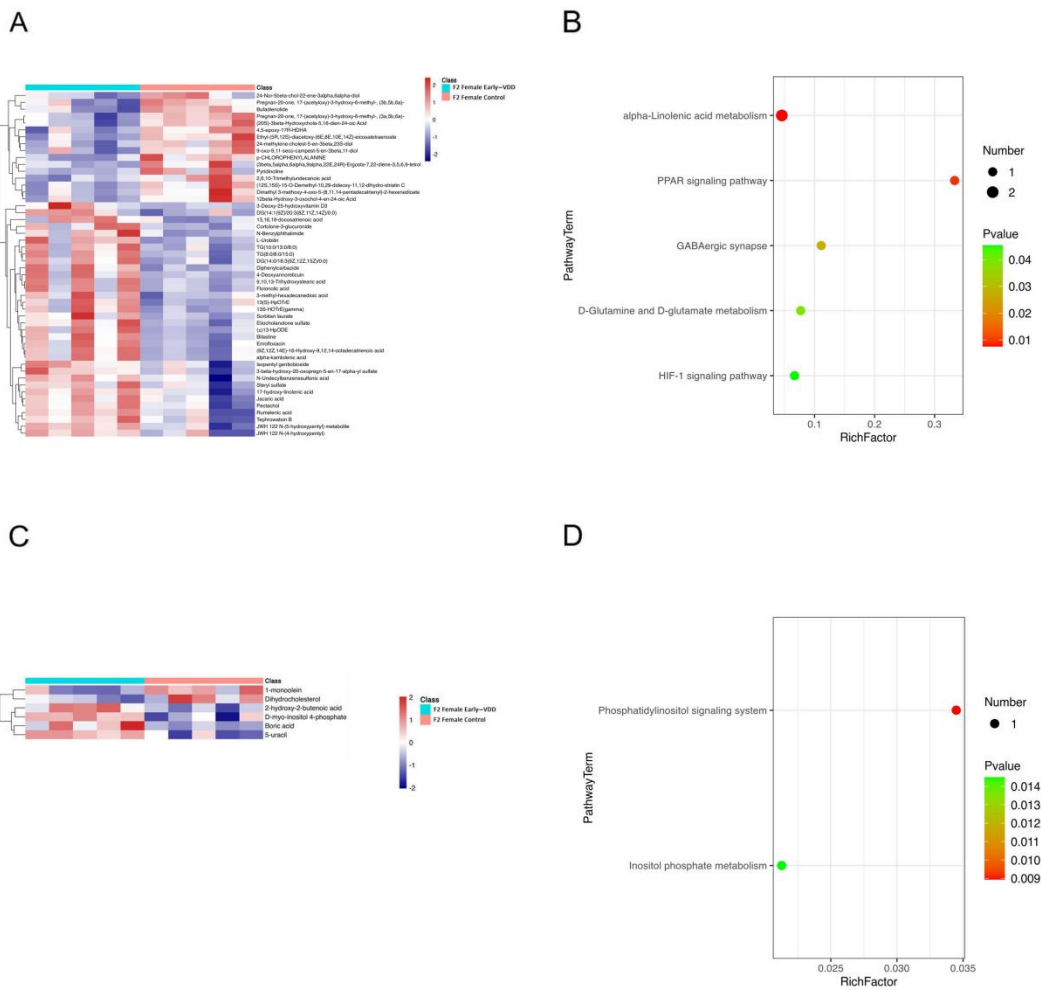

**Fig. S15. Changes of metabolites and metabolic pathways in feces of F2 female rats at 8 week.** (A) Heatmap of changed fecal metabolites in F2 Female Early-VDD and F2 Female Control by LC-MS analysis at 8 week. (B) KEGG enriched pathways of changed fecal metabolites by LC-MS in F2 Female Early-VDD vs. F2 Female Control at 8 week. (C) Heatmap of changed fecal metabolites in F2 Female Early-VDD and F2 Female Control by GC-MS analysis at 8 week. (D) KEGG enriched pathways of changed fecal metabolites by GC-MS in F2 Female Early-VDD vs. F2 Female Control at 8 week.

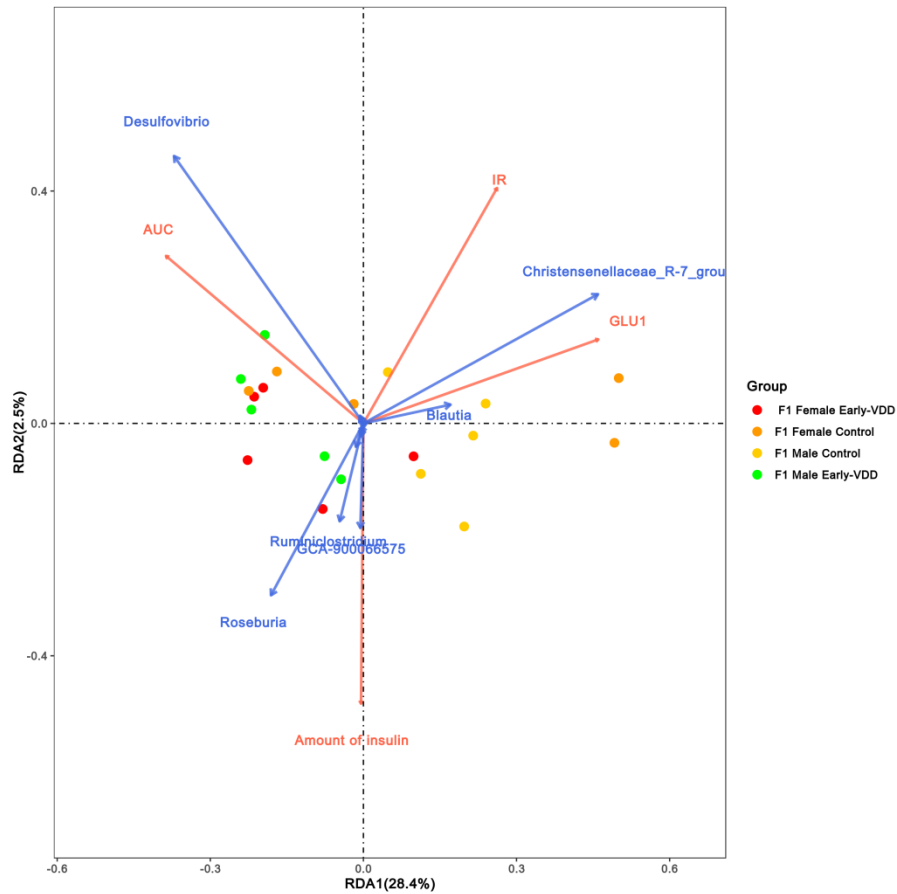

**Fig S16** Redundancy analysis between intestinal flora and the indicators of glucose tolerance at the genus level. Notes: fasting blood glucose levels (GLU1), blood insulin (Amount of Insulin), insulin resistance (IR), AUC Area under the curve of glucose tolerance test.
