# Supplementary material for: Vitamin D deficiency in early life regulates gut microbiome composition and leads to impaired glucose tolerance in adult and offspring rats
Source: Royal Society of Chemistry journal article supplement (doi:10.1039/d3fo00503h), 2023-01-01
Supplement: d3fo00503h5.pdf [file d3fo00503h5.pdf]

Table S4. The composition of the two different diets of the Control and Early-VDD group.

| Nutrient                        | Control (U/kg diet) | Early-VDD(U/kg diet) |
|---------------------------------|---------------------|----------------------|
| Total energy, <sup>2</sup> kcal | 3766.0              | 3766.0               |
| %as protein                     | 19.3                | 19.3                 |
| %as CHO                         | 64.0                | 64.0                 |
| %as fat                         | 16.7                | 16.7                 |
| Moisture,g                      | 66.0                | 66.0                 |
| Total fat, g                    | 70.0                | 70.0                 |
| Saturated, g                    | 10.8                | 10.8                 |
| Monounsaturated, g              | 16.3                | 16.3                 |
| Polyunsaturated, g              | 40.5                | 40.5                 |
| Linoleic acid,g                 | 35.7                | 35.7                 |
| Linolenic acid,g                | 4.8                 | 4.8                  |
| Total carbohydrate,g            | 643.7               | 643.7                |
| Complex carbohydrates,g         | 360.1               | 360.1                |
| Simple sugars,g                 | 236.1               | 236.1                |
| Cellulose,g                     | 47.5                | 47.5                 |
| Total protein,g                 | 178.6               | 178.6                |
| Amino acids (typical analysis)  |                     |                      |
| Alanine,g                       | 4.6                 | 4.6                  |
| Arginine,g                      | 6.4                 | 6.4                  |
| Aspartic acid,g                 | 12.2                | 12.2                 |
| Cystine, <sup>3</sup> g         | 3.7                 | 3.7                  |
| Glutamic acid,g                 | 36.3                | 36.3                 |
| Glycine,g                       | 3.2                 | 3.2                  |
| Histidine, g                    | 4.6                 | 4.6                  |
| Isoleucine,g                    | 8.5                 | 8.5                  |
| Leucine,g                       | 15.4                | 15.4                 |
| Lysine,g                        | 13.0                | 13.0                 |
| Methionine, g                   | 4.6                 | 4.6                  |
| Phenylalanine,g                 | 8.8                 | 8.8                  |
| Proline, g                      | 20.5                | 20.5                 |
| Serine,g                        | 9.7                 | 9.7                  |
| Threonine,g                     | 6.7                 | 6.7                  |
| Tryptophan,g                    | 2.1                 | 2.1                  |
| Tyrosine,g                      | 9.3                 | 9.3                  |
| Valine, g                       | 10.0                | 10.0                 |
| Total ash, g                    | 41.7                | 41.7                 |
| Minerals                        |                     |                      |
| Calcium, mg                     | 5000.0              | 5000.0               |
| Phosphorus, mg                  | 3000.0              | 3000.0               |
| Magnesium, mg                   | 513.0               | 513.0                |
| Sodium, mg                      | 1039.0              | 1039.0               |

[continued]

|                        |        |        |
|------------------------|--------|--------|
| Potassium,mg           | 3600.0 | 3600.0 |
| Chloride, mg           | 1631.0 | 1631.0 |
| Sulfur (inorganic), mg | 300.0  | 300.0  |
| Iron, mg               | 45.0   | 45.0   |
| Zinc, mg               | 38.0   | 38.0   |
| Manganese, mg          | 10.0   | 10.0   |
| Copper,mg              | 6.0    | 6.0    |
| Iodine, mg             | 0.2    | 0.2    |
| Molybdenum,mg          | 0.15   | 0.15   |
| Selenium, mg           | 0.18   | 0.18   |
| Silicon, mg            | 5.0    | 5.0    |
| Chromium, mg           | 1.0    | 1.0    |
| Fluoride, mg           | 1.0    | 1.0    |
| Nickel, mg             | 0.5    | 0.5    |
| Boron, mg              | 0.5    | 0.5    |
| Lithium, mg            | 0.1    | 0.1    |
| Vanadium, mg           | 0.1    | 0.1    |
| Vitamins               |        |        |
| Nicotinic acid, mg     | 30.0   | 30.0   |
| Ca pantothenate, mg    | 15.0   | 15.0   |
| Pyridoxine, mg         | 6.0    | 6.0    |
| Thiamin, mg            | 5.0    | 5.0    |
| Riboflavin, mg         | 6.0    | 6.0    |
| Folic acid, mg         | 2.0    | 2.0    |
| Biotin, mg             | 0.2    | 0.2    |
| Vitamin B-12, µg       | 25.0   | 25.0   |
| Vitamin K, µg          | 900.0  | 900.0  |
| Vitamin E, IU          | 75.0   | 75.0   |
| Vitamin A, IU          | 4000.0 | 4000.0 |
| Vitamin D,IU           | 1000.0 | 25.0   |
| Other nutrients        |        |        |
| Choline, mg            | 1000.0 | 1000.0 |

---
